# Supplementary material for: Deep Learning on High-Throughput Transcriptomics to Predict Drug-Induced Liver Injury
Source: PubMed Central journal article supplement (PMC7728858; doi:10.3389/fbioe.2020.562677), 2020-11-27

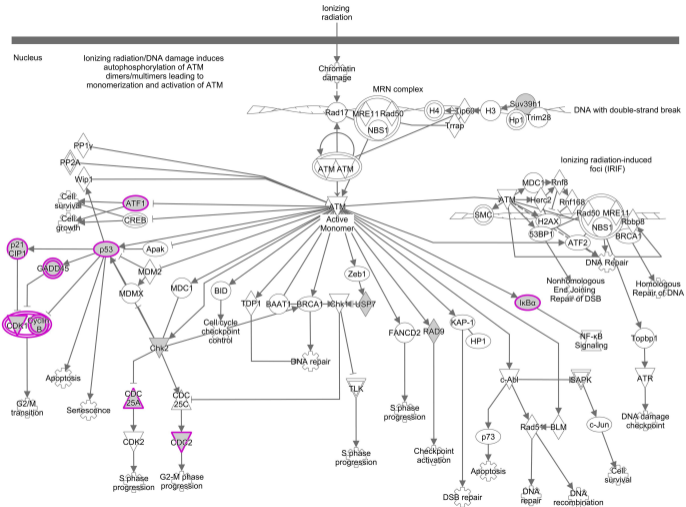

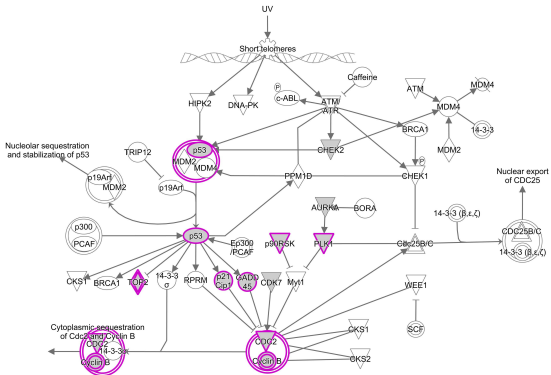

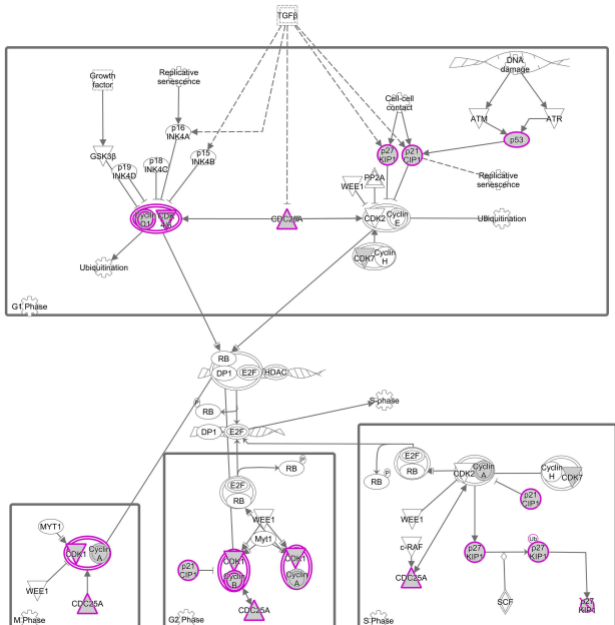

Nucleus

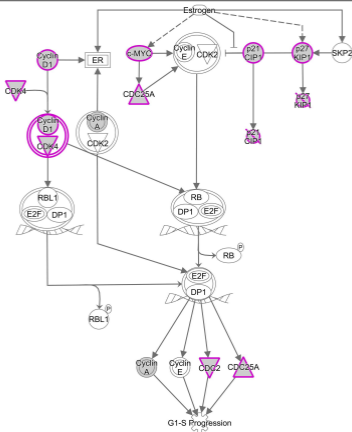

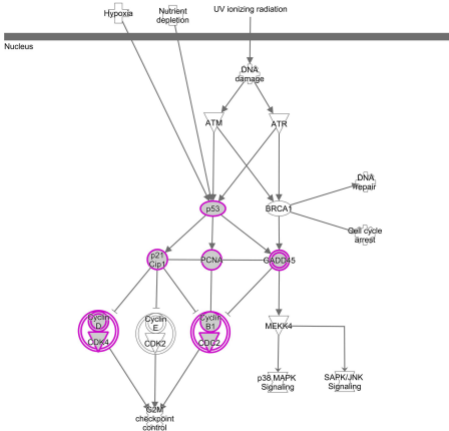

Supplement: Image_3.pdf [file Image_3.pdf]
