# Supplementary material for: Deep Learning on High-Throughput Transcriptomics to Predict Drug-Induced Liver Injury
Source: Front Bioeng Biotechnol. 2020 Nov 27;8:562677. doi: 10.3389/fbioe.2020.562677 (PMC7728858; doi:10.3389/fbioe.2020.562677)
Supplement: Supplementary file 5 [file Table_2.xlsx]

## Sheet: KNN
model	AUC	Sensitivity	Specificity	PPV	NPV	Accuracy	F1	MCC	V
knn_k3	0.723(±0.016)	0.796(±0.024)	0.548(±0.027)	0.721(±0.012)	0.648(±0.025)	0.696(±0.015)	0.757(±0.014)	0.357(±0.031)	0.224(±0.025)
knn_k5	0.729(±0.015)	0.843(±0.024)	0.514(±0.026)	0.718(±0.01)	0.691(±0.029)	0.709(±0.014)	0.775(±0.012)	0.382(±0.03)	0.222(±0.023)
knn_k7	0.729(±0.015)	0.869(±0.023)	0.486(±0.027)	0.713(±0.01)	0.719(±0.032)	0.714(±0.014)	0.783(±0.012)	0.392(±0.031)	0.215(±0.023)
knn_k9	0.729(±0.015)	0.891(±0.022)	0.464(±0.026)	0.709(±0.009)	0.745(±0.035)	0.718(±0.013)	0.79(±0.011)	0.401(±0.031)	0.21(±0.021)
knn_k11	0.726(±0.016)	0.909(±0.022)	0.446(±0.027)	0.707(±0.01)	0.771(±0.04)	0.721(±0.014)	0.795(±0.012)	0.411(±0.035)	0.206(±0.023)

## Sheet: SVM
model	AUC	Sensitivity	Specificity	PPV	NPV	Accuracy	F1	MCC	V
svm_11_kernel_rbf_C_10_gamma_0.0001	0.751(±0.015)	0.883(±0.015)	0.521(±0.025)	0.73(±0.01)	0.753(±0.023)	0.736(±0.011)	0.799(±0.009)	0.442(±0.026)	0.256(±0.023)
svm_7_kernel_rbf_C_1_gamma_0.0001	0.747(±0.015)	0.988(±0.007)	0.422(±0.024)	0.715(±0.008)	0.96(±0.021)	0.758(±0.009)	0.829(±0.006)	0.525(±0.021)	0.243(±0.021)
svm_10_kernel_poly_C_10_gamma_0.001	0.736(±0.016)	0.881(±0.014)	0.498(±0.027)	0.721(±0.011)	0.741(±0.024)	0.726(±0.013)	0.793(±0.01)	0.418(±0.03)	0.234(±0.026)
svm_1_kernel_poly_C_0.1_gamma_0.01	0.743(±0.016)	0.875(±0.015)	0.502(±0.026)	0.721(±0.011)	0.732(±0.025)	0.724(±0.013)	0.79(±0.01)	0.413(±0.03)	0.233(±0.025)
svm_14_kernel_poly_C_100_gamma_0.001	0.743(±0.016)	0.875(±0.015)	0.502(±0.026)	0.721(±0.011)	0.732(±0.025)	0.724(±0.013)	0.79(±0.01)	0.413(±0.03)	0.233(±0.025)
svm_15_kernel_rbf_C_100_gamma_0.0001	0.731(±0.016)	0.748(±0.019)	0.589(±0.029)	0.728(±0.012)	0.615(±0.016)	0.684(±0.012)	0.738(±0.011)	0.34(±0.026)	0.23(±0.024)
svm_6_kernel_poly_C_1_gamma_0.001	0.736(±0.016)	0.916(±0.012)	0.466(±0.026)	0.716(±0.01)	0.792(±0.024)	0.734(±0.012)	0.804(±0.008)	0.441(±0.028)	0.229(±0.024)
svm_19_kernel_poly_C_1000_gamma_0.0001	0.736(±0.016)	0.916(±0.012)	0.466(±0.026)	0.716(±0.01)	0.792(±0.024)	0.734(±0.012)	0.804(±0.008)	0.441(±0.028)	0.229(±0.024)
svm_0_kernel_poly_C_0.1_gamma_0.1	0.731(±0.016)	0.834(±0.017)	0.527(±0.027)	0.721(±0.012)	0.684(±0.024)	0.709(±0.014)	0.773(±0.011)	0.382(±0.031)	0.228(±0.027)
svm_4_kernel_poly_C_1_gamma_0.1	0.731(±0.016)	0.834(±0.017)	0.527(±0.027)	0.721(±0.012)	0.684(±0.024)	0.709(±0.014)	0.773(±0.011)	0.382(±0.031)	0.228(±0.027)
svm_8_kernel_poly_C_10_gamma_0.1	0.731(±0.016)	0.834(±0.017)	0.527(±0.027)	0.721(±0.012)	0.684(±0.024)	0.709(±0.014)	0.773(±0.011)	0.382(±0.031)	0.228(±0.027)
svm_9_kernel_poly_C_10_gamma_0.01	0.731(±0.016)	0.834(±0.017)	0.527(±0.027)	0.721(±0.012)	0.684(±0.024)	0.709(±0.014)	0.773(±0.011)	0.382(±0.031)	0.228(±0.027)
svm_12_kernel_poly_C_100_gamma_0.1	0.731(±0.016)	0.834(±0.017)	0.527(±0.027)	0.721(±0.012)	0.684(±0.024)	0.709(±0.014)	0.773(±0.011)	0.382(±0.031)	0.228(±0.027)
svm_13_kernel_poly_C_100_gamma_0.01	0.731(±0.016)	0.834(±0.017)	0.527(±0.027)	0.721(±0.012)	0.684(±0.024)	0.709(±0.014)	0.773(±0.011)	0.382(±0.031)	0.228(±0.027)
svm_16_kernel_poly_C_1000_gamma_0.1	0.731(±0.016)	0.834(±0.017)	0.527(±0.027)	0.721(±0.012)	0.684(±0.024)	0.709(±0.014)	0.773(±0.011)	0.382(±0.031)	0.228(±0.027)
svm_17_kernel_poly_C_1000_gamma_0.01	0.731(±0.016)	0.834(±0.017)	0.527(±0.027)	0.721(±0.012)	0.684(±0.024)	0.709(±0.014)	0.773(±0.011)	0.382(±0.031)	0.228(±0.027)
svm_5_kernel_poly_C_1_gamma_0.01	0.731(±0.016)	0.834(±0.016)	0.526(±0.027)	0.721(±0.012)	0.683(±0.023)	0.709(±0.014)	0.773(±0.011)	0.381(±0.03)	0.227(±0.026)
svm_18_kernel_poly_C_1000_gamma_0.001	0.731(±0.016)	0.834(±0.016)	0.526(±0.027)	0.721(±0.012)	0.683(±0.023)	0.709(±0.014)	0.773(±0.011)	0.381(±0.03)	0.227(±0.026)
svm_19_kernel_rbf_C_1000_gamma_0.0001	0.721(±0.016)	0.712(±0.02)	0.604(±0.027)	0.725(±0.013)	0.588(±0.017)	0.668(±0.013)	0.718(±0.012)	0.315(±0.028)	0.221(±0.025)
svm_10_kernel_rbf_C_10_gamma_0.001	0.734(±0.014)	0.901(±0.012)	0.446(±0.023)	0.705(±0.009)	0.755(±0.023)	0.717(±0.011)	0.791(±0.008)	0.4(±0.025)	0.201(±0.02)
svm_14_kernel_rbf_C_100_gamma_0.001	0.734(±0.014)	0.901(±0.012)	0.446(±0.024)	0.705(±0.009)	0.755(±0.024)	0.717(±0.011)	0.791(±0.008)	0.4(±0.026)	0.201(±0.02)
svm_18_kernel_rbf_C_1000_gamma_0.001	0.734(±0.014)	0.901(±0.012)	0.446(±0.024)	0.705(±0.009)	0.755(±0.024)	0.717(±0.011)	0.791(±0.008)	0.4(±0.026)	0.201(±0.02)
svm_6_kernel_rbf_C_1_gamma_0.001	0.735(±0.018)	0.989(±0.005)	0.367(±0.022)	0.697(±0.007)	0.959(±0.019)	0.737(±0.01)	0.817(±0.006)	0.483(±0.022)	0.196(±0.019)
svm_3_kernel_rbf_C_0.1_gamma_0.0001	0.736(±0.016)	0.999(±0.001)	0.344(±0.022)	0.691(±0.007)	0.994(±0.006)	0.733(±0.009)	0.817(±0.005)	0.484(±0.018)	0.184(±0.018)
svm_2_kernel_poly_C_0.1_gamma_0.001	0.732(±0.017)	0.971(±0.007)	0.358(±0.022)	0.689(±0.007)	0.893(±0.022)	0.722(±0.009)	0.806(±0.006)	0.437(±0.022)	0.175(±0.018)
svm_15_kernel_poly_C_100_gamma_0.0001	0.732(±0.017)	0.971(±0.007)	0.358(±0.022)	0.689(±0.007)	0.893(±0.022)	0.722(±0.009)	0.806(±0.006)	0.437(±0.022)	0.175(±0.018)
svm_11_kernel_poly_C_10_gamma_0.0001	0.733(±0.016)	0.994(±0.003)	0.261(±0.02)	0.664(±0.006)	0.966(±0.018)	0.697(±0.008)	0.796(±0.004)	0.401(±0.02)	0.118(±0.014)
svm_7_kernel_poly_C_1_gamma_0.0001	0.73(±0.016)	1.0(±0.0)	0.097(±0.014)	0.619(±0.004)	1.0(±0.0)	0.634(±0.005)	0.765(±0.003)	0.245(±0.018)	0.029(±0.006)
svm_2_kernel_rbf_C_0.1_gamma_0.001	0.727(±0.018)	0.999(±0.001)	0.083(±0.012)	0.615(±0.003)	0.988(±0.017)	0.628(±0.005)	0.762(±0.002)	0.223(±0.017)	0.023(±0.005)
svm_3_kernel_poly_C_0.1_gamma_0.0001	0.726(±0.017)	1.0(±0.0)	0.011(±0.005)	0.597(±0.001)	1.0(±0.0)	0.599(±0.002)	0.748(±0.001)	0.079(±0.018)	0.001(±0.001)
svm_0_kernel_rbf_C_0.1_gamma_0.1	0.493(±0.003)	1.0(±0.0)	0.0(±0.0)	0.595(±0.0)	0.0(±0.0)	0.595(±0.0)	0.746(±0.0)	0.0(±0.0)	0.0(±0.0)
svm_1_kernel_rbf_C_0.1_gamma_0.01	0.688(±0.018)	1.0(±0.0)	0.0(±0.0)	0.595(±0.0)	0.0(±0.0)	0.595(±0.0)	0.746(±0.0)	0.0(±0.0)	0.0(±0.0)
svm_4_kernel_rbf_C_1_gamma_0.1	0.489(±0.004)	1.0(±0.0)	0.0(±0.0)	0.595(±0.0)	0.0(±0.0)	0.595(±0.0)	0.746(±0.0)	0.0(±0.0)	0.0(±0.0)
svm_5_kernel_rbf_C_1_gamma_0.01	0.689(±0.018)	1.0(±0.0)	0.0(±0.0)	0.595(±0.0)	0.0(±0.0)	0.595(±0.0)	0.746(±0.0)	0.0(±0.0)	0.0(±0.0)
svm_8_kernel_rbf_C_10_gamma_0.1	0.489(±0.004)	1.0(±0.0)	0.0(±0.0)	0.595(±0.0)	0.0(±0.0)	0.595(±0.0)	0.746(±0.0)	0.0(±0.0)	0.0(±0.0)
svm_9_kernel_rbf_C_10_gamma_0.01	0.689(±0.018)	1.0(±0.0)	0.0(±0.0)	0.595(±0.0)	0.0(±0.0)	0.595(±0.0)	0.746(±0.0)	0.0(±0.0)	0.0(±0.0)
svm_12_kernel_rbf_C_100_gamma_0.1	0.489(±0.004)	1.0(±0.0)	0.0(±0.0)	0.595(±0.0)	0.0(±0.0)	0.595(±0.0)	0.746(±0.0)	0.0(±0.0)	0.0(±0.0)
svm_13_kernel_rbf_C_100_gamma_0.01	0.689(±0.018)	1.0(±0.0)	0.0(±0.0)	0.595(±0.0)	0.0(±0.0)	0.595(±0.0)	0.746(±0.0)	0.0(±0.0)	0.0(±0.0)
svm_16_kernel_rbf_C_1000_gamma_0.1	0.489(±0.004)	1.0(±0.0)	0.0(±0.0)	0.595(±0.0)	0.0(±0.0)	0.595(±0.0)	0.746(±0.0)	0.0(±0.0)	0.0(±0.0)
svm_17_kernel_rbf_C_1000_gamma_0.01	0.689(±0.018)	1.0(±0.0)	0.0(±0.0)	0.595(±0.0)	0.0(±0.0)	0.595(±0.0)	0.746(±0.0)	0.0(±0.0)	0.0(±0.0)

## Sheet: RF
model	AUC	Sensitivity	Specificity	PPV	NPV	Accuracy	F1	MCC	V
rf_171_n_500_depth_None_split_2_leaf_1	0.743(±0.018)	0.978(±0.007)	0.424(±0.023)	0.714(±0.008)	0.928(±0.022)	0.753(±0.01)	0.825(±0.007)	0.508(±0.024)	0.237(±0.022)
rf_174_n_500_depth_None_split_5_leaf_1	0.743(±0.018)	0.979(±0.007)	0.423(±0.023)	0.714(±0.008)	0.932(±0.021)	0.754(±0.01)	0.825(±0.007)	0.509(±0.024)	0.237(±0.022)
rf_99_n_300_depth_None_split_2_leaf_1	0.742(±0.018)	0.975(±0.008)	0.425(±0.024)	0.713(±0.009)	0.921(±0.023)	0.752(±0.011)	0.824(±0.007)	0.503(±0.025)	0.236(±0.022)
rf_135_n_400_depth_None_split_2_leaf_1	0.743(±0.018)	0.977(±0.007)	0.424(±0.022)	0.713(±0.008)	0.925(±0.021)	0.753(±0.01)	0.825(±0.006)	0.506(±0.022)	0.236(±0.021)
rf_138_n_400_depth_None_split_5_leaf_1	0.743(±0.018)	0.978(±0.007)	0.423(±0.022)	0.713(±0.008)	0.93(±0.021)	0.753(±0.01)	0.825(±0.007)	0.508(±0.024)	0.236(±0.021)
rf_102_n_300_depth_None_split_5_leaf_1	0.743(±0.018)	0.976(±0.007)	0.423(±0.023)	0.713(±0.008)	0.925(±0.022)	0.752(±0.01)	0.824(±0.007)	0.505(±0.024)	0.235(±0.021)
rf_139_n_400_depth_None_split_5_leaf_2	0.745(±0.018)	0.982(±0.007)	0.418(±0.023)	0.712(±0.008)	0.941(±0.021)	0.753(±0.01)	0.826(±0.006)	0.511(±0.023)	0.235(±0.021)
rf_175_n_500_depth_None_split_5_leaf_2	0.746(±0.018)	0.983(±0.006)	0.418(±0.022)	0.712(±0.008)	0.942(±0.02)	0.754(±0.01)	0.826(±0.006)	0.512(±0.023)	0.235(±0.021)
rf_63_n_200_depth_None_split_2_leaf_1	0.742(±0.018)	0.971(±0.009)	0.427(±0.023)	0.713(±0.008)	0.911(±0.025)	0.751(±0.01)	0.823(±0.007)	0.498(±0.025)	0.235(±0.021)
rf_103_n_300_depth_None_split_5_leaf_2	0.745(±0.018)	0.981(±0.007)	0.419(±0.023)	0.712(±0.008)	0.937(±0.022)	0.753(±0.01)	0.825(±0.007)	0.509(±0.024)	0.234(±0.022)
rf_172_n_500_depth_None_split_2_leaf_2	0.745(±0.018)	0.982(±0.006)	0.417(±0.023)	0.712(±0.008)	0.941(±0.02)	0.753(±0.01)	0.826(±0.007)	0.511(±0.024)	0.234(±0.022)
rf_177_n_500_depth_None_split_10_leaf_1	0.742(±0.018)	0.978(±0.006)	0.421(±0.023)	0.713(±0.008)	0.928(±0.02)	0.752(±0.01)	0.824(±0.007)	0.505(±0.024)	0.234(±0.022)
rf_66_n_200_depth_None_split_5_leaf_1	0.742(±0.018)	0.973(±0.008)	0.424(±0.023)	0.713(±0.008)	0.916(±0.024)	0.751(±0.011)	0.823(±0.007)	0.5(±0.025)	0.234(±0.022)
rf_141_n_400_depth_None_split_10_leaf_1	0.741(±0.018)	0.977(±0.006)	0.421(±0.022)	0.712(±0.008)	0.925(±0.019)	0.752(±0.01)	0.824(±0.006)	0.504(±0.023)	0.234(±0.021)
rf_142_n_400_depth_None_split_10_leaf_2	0.744(±0.018)	0.982(±0.007)	0.417(±0.022)	0.712(±0.008)	0.94(±0.022)	0.753(±0.01)	0.825(±0.006)	0.51(±0.023)	0.234(±0.021)
rf_67_n_200_depth_None_split_5_leaf_2	0.744(±0.017)	0.979(±0.007)	0.42(±0.022)	0.712(±0.008)	0.932(±0.022)	0.752(±0.01)	0.825(±0.006)	0.507(±0.023)	0.234(±0.021)
rf_136_n_400_depth_None_split_2_leaf_2	0.745(±0.017)	0.982(±0.006)	0.417(±0.023)	0.712(±0.008)	0.939(±0.021)	0.753(±0.011)	0.825(±0.007)	0.509(±0.024)	0.233(±0.022)
rf_27_n_100_depth_None_split_2_leaf_1	0.738(±0.018)	0.961(±0.008)	0.434(±0.024)	0.714(±0.009)	0.884(±0.022)	0.747(±0.01)	0.819(±0.007)	0.486(±0.023)	0.233(±0.022)
rf_64_n_200_depth_None_split_2_leaf_2	0.744(±0.017)	0.978(±0.007)	0.419(±0.023)	0.712(±0.008)	0.93(±0.021)	0.752(±0.01)	0.824(±0.007)	0.505(±0.024)	0.233(±0.022)
rf_100_n_300_depth_None_split_2_leaf_2	0.745(±0.017)	0.981(±0.007)	0.417(±0.022)	0.712(±0.008)	0.938(±0.022)	0.752(±0.01)	0.825(±0.007)	0.508(±0.024)	0.233(±0.021)
rf_105_n_300_depth_None_split_10_leaf_1	0.741(±0.018)	0.976(±0.007)	0.421(±0.023)	0.712(±0.008)	0.923(±0.021)	0.751(±0.01)	0.823(±0.007)	0.502(±0.024)	0.233(±0.021)
rf_106_n_300_depth_None_split_10_leaf_2	0.744(±0.018)	0.981(±0.007)	0.416(±0.022)	0.712(±0.008)	0.937(±0.022)	0.752(±0.01)	0.825(±0.006)	0.507(±0.023)	0.233(±0.021)
rf_178_n_500_depth_None_split_10_leaf_2	0.745(±0.018)	0.983(±0.007)	0.416(±0.021)	0.712(±0.008)	0.942(±0.023)	0.753(±0.01)	0.826(±0.006)	0.51(±0.024)	0.233(±0.021)
rf_28_n_100_depth_None_split_2_leaf_2	0.74(±0.017)	0.972(±0.008)	0.423(±0.023)	0.712(±0.008)	0.913(±0.024)	0.75(±0.011)	0.822(±0.007)	0.497(±0.025)	0.232(±0.022)
rf_31_n_100_depth_None_split_5_leaf_2	0.74(±0.017)	0.973(±0.008)	0.423(±0.023)	0.712(±0.008)	0.913(±0.025)	0.75(±0.011)	0.822(±0.007)	0.498(±0.026)	0.232(±0.022)
rf_69_n_200_depth_None_split_10_leaf_1	0.74(±0.018)	0.973(±0.007)	0.423(±0.023)	0.712(±0.008)	0.914(±0.022)	0.75(±0.011)	0.822(±0.007)	0.498(±0.025)	0.232(±0.022)
rf_70_n_200_depth_None_split_10_leaf_2	0.743(±0.018)	0.979(±0.007)	0.417(±0.023)	0.711(±0.008)	0.931(±0.022)	0.751(±0.01)	0.824(±0.007)	0.504(±0.024)	0.232(±0.021)
rf_33_n_100_depth_None_split_10_leaf_1	0.737(±0.018)	0.967(±0.008)	0.427(±0.024)	0.712(±0.009)	0.897(±0.023)	0.748(±0.011)	0.82(±0.007)	0.489(±0.026)	0.231(±0.023)
rf_173_n_500_depth_None_split_2_leaf_4	0.747(±0.018)	0.985(±0.006)	0.412(±0.024)	0.711(±0.008)	0.948(±0.02)	0.752(±0.01)	0.826(±0.006)	0.511(±0.023)	0.231(±0.022)
rf_176_n_500_depth_None_split_5_leaf_4	0.747(±0.018)	0.985(±0.006)	0.412(±0.024)	0.711(±0.008)	0.948(±0.02)	0.752(±0.01)	0.826(±0.006)	0.511(±0.023)	0.231(±0.022)
rf_30_n_100_depth_None_split_5_leaf_1	0.738(±0.018)	0.966(±0.008)	0.428(±0.023)	0.713(±0.009)	0.895(±0.023)	0.748(±0.011)	0.82(±0.007)	0.489(±0.025)	0.231(±0.022)
rf_101_n_300_depth_None_split_2_leaf_4	0.746(±0.018)	0.984(±0.006)	0.412(±0.023)	0.711(±0.008)	0.946(±0.021)	0.752(±0.01)	0.825(±0.006)	0.509(±0.023)	0.231(±0.021)
rf_104_n_300_depth_None_split_5_leaf_4	0.746(±0.018)	0.984(±0.006)	0.412(±0.023)	0.711(±0.008)	0.946(±0.021)	0.752(±0.01)	0.825(±0.006)	0.509(±0.023)	0.231(±0.021)
rf_137_n_400_depth_None_split_2_leaf_4	0.746(±0.018)	0.984(±0.006)	0.412(±0.023)	0.711(±0.008)	0.947(±0.021)	0.752(±0.01)	0.825(±0.006)	0.51(±0.023)	0.231(±0.021)
rf_140_n_400_depth_None_split_5_leaf_4	0.746(±0.018)	0.984(±0.006)	0.412(±0.023)	0.711(±0.008)	0.947(±0.021)	0.752(±0.01)	0.825(±0.006)	0.51(±0.023)	0.231(±0.021)
rf_34_n_100_depth_None_split_10_leaf_2	0.74(±0.018)	0.974(±0.007)	0.42(±0.023)	0.712(±0.008)	0.918(±0.022)	0.75(±0.01)	0.822(±0.007)	0.498(±0.024)	0.231(±0.021)
rf_179_n_500_depth_None_split_10_leaf_4	0.746(±0.018)	0.985(±0.006)	0.411(±0.022)	0.71(±0.008)	0.949(±0.02)	0.752(±0.01)	0.825(±0.006)	0.511(±0.022)	0.231(±0.02)
rf_65_n_200_depth_None_split_2_leaf_4	0.744(±0.017)	0.982(±0.006)	0.412(±0.023)	0.71(±0.008)	0.941(±0.02)	0.751(±0.01)	0.824(±0.006)	0.507(±0.023)	0.23(±0.021)
rf_68_n_200_depth_None_split_5_leaf_4	0.744(±0.017)	0.982(±0.006)	0.412(±0.023)	0.71(±0.008)	0.941(±0.02)	0.751(±0.01)	0.824(±0.006)	0.507(±0.023)	0.23(±0.021)
rf_143_n_400_depth_None_split_10_leaf_4	0.746(±0.018)	0.985(±0.006)	0.41(±0.022)	0.71(±0.008)	0.948(±0.02)	0.752(±0.01)	0.825(±0.006)	0.51(±0.022)	0.23(±0.02)
rf_29_n_100_depth_None_split_2_leaf_4	0.741(±0.018)	0.978(±0.008)	0.414(±0.023)	0.71(±0.008)	0.929(±0.024)	0.75(±0.011)	0.823(±0.007)	0.501(±0.025)	0.229(±0.022)
rf_32_n_100_depth_None_split_5_leaf_4	0.741(±0.018)	0.978(±0.008)	0.414(±0.023)	0.71(±0.008)	0.929(±0.024)	0.75(±0.011)	0.823(±0.007)	0.501(±0.025)	0.229(±0.022)
rf_35_n_100_depth_None_split_10_leaf_4	0.74(±0.018)	0.979(±0.006)	0.414(±0.024)	0.71(±0.009)	0.93(±0.021)	0.75(±0.011)	0.823(±0.007)	0.502(±0.024)	0.229(±0.022)
rf_71_n_200_depth_None_split_10_leaf_4	0.744(±0.018)	0.983(±0.006)	0.41(±0.024)	0.71(±0.009)	0.943(±0.02)	0.751(±0.011)	0.824(±0.007)	0.507(±0.024)	0.229(±0.022)
rf_107_n_300_depth_None_split_10_leaf_4	0.745(±0.017)	0.984(±0.006)	0.41(±0.023)	0.71(±0.008)	0.946(±0.019)	0.751(±0.01)	0.825(±0.006)	0.508(±0.022)	0.229(±0.021)
rf_162_n_500_depth_12_split_2_leaf_1	0.748(±0.018)	0.987(±0.005)	0.404(±0.023)	0.709(±0.008)	0.956(±0.018)	0.751(±0.01)	0.825(±0.006)	0.51(±0.021)	0.227(±0.021)
rf_166_n_500_depth_12_split_5_leaf_2	0.748(±0.018)	0.987(±0.005)	0.404(±0.023)	0.709(±0.008)	0.956(±0.018)	0.751(±0.01)	0.825(±0.006)	0.51(±0.022)	0.227(±0.021)
rf_129_n_400_depth_12_split_5_leaf_1	0.747(±0.017)	0.987(±0.005)	0.404(±0.022)	0.709(±0.008)	0.956(±0.017)	0.751(±0.009)	0.825(±0.006)	0.51(±0.021)	0.227(±0.02)
rf_165_n_500_depth_12_split_5_leaf_1	0.748(±0.017)	0.987(±0.005)	0.404(±0.022)	0.709(±0.008)	0.956(±0.017)	0.751(±0.009)	0.825(±0.006)	0.51(±0.021)	0.227(±0.02)
rf_20_n_100_depth_12_split_2_leaf_4	0.743(±0.019)	0.984(±0.005)	0.406(±0.025)	0.709(±0.009)	0.947(±0.018)	0.75(±0.011)	0.824(±0.007)	0.506(±0.024)	0.226(±0.023)
rf_23_n_100_depth_12_split_5_leaf_4	0.743(±0.019)	0.984(±0.005)	0.406(±0.025)	0.709(±0.009)	0.947(±0.018)	0.75(±0.011)	0.824(±0.007)	0.506(±0.024)	0.226(±0.023)
rf_126_n_400_depth_12_split_2_leaf_1	0.748(±0.018)	0.987(±0.006)	0.404(±0.023)	0.709(±0.008)	0.955(±0.019)	0.751(±0.01)	0.825(±0.006)	0.509(±0.022)	0.226(±0.021)
rf_128_n_400_depth_12_split_2_leaf_4	0.747(±0.018)	0.988(±0.006)	0.403(±0.023)	0.708(±0.008)	0.957(±0.019)	0.751(±0.01)	0.825(±0.006)	0.51(±0.022)	0.226(±0.021)
rf_130_n_400_depth_12_split_5_leaf_2	0.747(±0.018)	0.987(±0.006)	0.404(±0.023)	0.709(±0.008)	0.955(±0.019)	0.751(±0.01)	0.825(±0.006)	0.509(±0.023)	0.226(±0.021)
rf_131_n_400_depth_12_split_5_leaf_4	0.747(±0.018)	0.988(±0.006)	0.403(±0.023)	0.708(±0.008)	0.957(±0.019)	0.751(±0.01)	0.825(±0.006)	0.51(±0.022)	0.226(±0.021)
rf_164_n_500_depth_12_split_2_leaf_4	0.747(±0.018)	0.987(±0.006)	0.403(±0.023)	0.708(±0.008)	0.957(±0.019)	0.751(±0.01)	0.825(±0.006)	0.509(±0.022)	0.226(±0.021)
rf_167_n_500_depth_12_split_5_leaf_4	0.747(±0.018)	0.987(±0.006)	0.403(±0.023)	0.708(±0.008)	0.957(±0.019)	0.751(±0.01)	0.825(±0.006)	0.509(±0.022)	0.226(±0.021)
rf_169_n_500_depth_12_split_10_leaf_2	0.746(±0.018)	0.988(±0.006)	0.403(±0.023)	0.708(±0.008)	0.957(±0.019)	0.751(±0.01)	0.825(±0.006)	0.51(±0.022)	0.226(±0.021)
rf_55_n_200_depth_12_split_2_leaf_2	0.745(±0.018)	0.986(±0.006)	0.405(±0.023)	0.709(±0.008)	0.951(±0.021)	0.75(±0.01)	0.824(±0.006)	0.507(±0.023)	0.226(±0.021)
rf_91_n_300_depth_12_split_2_leaf_2	0.747(±0.018)	0.987(±0.005)	0.403(±0.023)	0.708(±0.008)	0.954(±0.018)	0.75(±0.01)	0.825(±0.006)	0.508(±0.023)	0.226(±0.021)
rf_93_n_300_depth_12_split_5_leaf_1	0.747(±0.017)	0.987(±0.005)	0.403(±0.023)	0.708(±0.008)	0.955(±0.018)	0.75(±0.01)	0.825(±0.006)	0.509(±0.021)	0.226(±0.021)
rf_127_n_400_depth_12_split_2_leaf_2	0.747(±0.018)	0.987(±0.005)	0.404(±0.022)	0.709(±0.008)	0.956(±0.018)	0.751(±0.01)	0.825(±0.006)	0.51(±0.022)	0.226(±0.02)
rf_163_n_500_depth_12_split_2_leaf_2	0.748(±0.019)	0.987(±0.005)	0.404(±0.022)	0.709(±0.008)	0.957(±0.019)	0.751(±0.01)	0.825(±0.006)	0.51(±0.022)	0.226(±0.02)
rf_168_n_500_depth_12_split_10_leaf_1	0.746(±0.018)	0.987(±0.006)	0.403(±0.022)	0.708(±0.008)	0.957(±0.02)	0.751(±0.01)	0.825(±0.006)	0.509(±0.022)	0.226(±0.02)
rf_26_n_100_depth_12_split_10_leaf_4	0.742(±0.019)	0.984(±0.006)	0.406(±0.023)	0.709(±0.008)	0.947(±0.02)	0.75(±0.01)	0.824(±0.006)	0.505(±0.022)	0.226(±0.02)
rf_54_n_200_depth_12_split_2_leaf_1	0.745(±0.019)	0.985(±0.006)	0.405(±0.022)	0.709(±0.008)	0.949(±0.019)	0.75(±0.01)	0.824(±0.006)	0.507(±0.022)	0.226(±0.02)
rf_90_n_300_depth_12_split_2_leaf_1	0.747(±0.018)	0.986(±0.005)	0.404(±0.022)	0.708(±0.008)	0.953(±0.017)	0.75(±0.009)	0.825(±0.006)	0.508(±0.021)	0.226(±0.02)
rf_19_n_100_depth_12_split_2_leaf_2	0.743(±0.018)	0.982(±0.006)	0.407(±0.024)	0.709(±0.008)	0.94(±0.02)	0.749(±0.01)	0.823(±0.006)	0.503(±0.024)	0.225(±0.022)
rf_24_n_100_depth_12_split_10_leaf_1	0.742(±0.019)	0.982(±0.006)	0.407(±0.024)	0.708(±0.008)	0.939(±0.02)	0.749(±0.01)	0.823(±0.006)	0.501(±0.023)	0.225(±0.022)
rf_132_n_400_depth_12_split_10_leaf_1	0.746(±0.018)	0.987(±0.006)	0.403(±0.022)	0.708(±0.008)	0.956(±0.02)	0.75(±0.01)	0.825(±0.006)	0.509(±0.023)	0.225(±0.021)
rf_133_n_400_depth_12_split_10_leaf_2	0.746(±0.018)	0.987(±0.006)	0.403(±0.023)	0.708(±0.008)	0.955(±0.019)	0.75(±0.01)	0.825(±0.006)	0.508(±0.022)	0.225(±0.021)
rf_21_n_100_depth_12_split_5_leaf_1	0.743(±0.016)	0.982(±0.007)	0.407(±0.023)	0.709(±0.008)	0.939(±0.022)	0.749(±0.01)	0.823(±0.006)	0.501(±0.024)	0.225(±0.021)
rf_22_n_100_depth_12_split_5_leaf_2	0.742(±0.018)	0.982(±0.006)	0.407(±0.023)	0.709(±0.008)	0.941(±0.019)	0.749(±0.01)	0.823(±0.006)	0.503(±0.023)	0.225(±0.021)
rf_56_n_200_depth_12_split_2_leaf_4	0.745(±0.019)	0.986(±0.006)	0.403(±0.023)	0.708(±0.008)	0.953(±0.019)	0.75(±0.01)	0.824(±0.006)	0.507(±0.022)	0.225(±0.021)
rf_57_n_200_depth_12_split_5_leaf_1	0.746(±0.017)	0.985(±0.006)	0.404(±0.023)	0.708(±0.008)	0.949(±0.02)	0.75(±0.01)	0.824(±0.006)	0.505(±0.023)	0.225(±0.021)
rf_58_n_200_depth_12_split_5_leaf_2	0.745(±0.018)	0.986(±0.006)	0.404(±0.023)	0.708(±0.008)	0.951(±0.019)	0.75(±0.01)	0.824(±0.006)	0.507(±0.023)	0.225(±0.021)
rf_59_n_200_depth_12_split_5_leaf_4	0.745(±0.019)	0.986(±0.006)	0.403(±0.023)	0.708(±0.008)	0.953(±0.019)	0.75(±0.01)	0.824(±0.006)	0.507(±0.022)	0.225(±0.021)
rf_60_n_200_depth_12_split_10_leaf_1	0.744(±0.018)	0.985(±0.006)	0.404(±0.023)	0.708(±0.008)	0.949(±0.02)	0.75(±0.01)	0.824(±0.006)	0.506(±0.023)	0.225(±0.021)
rf_94_n_300_depth_12_split_5_leaf_2	0.747(±0.018)	0.987(±0.006)	0.403(±0.023)	0.708(±0.008)	0.954(±0.019)	0.75(±0.01)	0.824(±0.006)	0.507(±0.022)	0.225(±0.021)
rf_96_n_300_depth_12_split_10_leaf_1	0.745(±0.018)	0.987(±0.006)	0.403(±0.022)	0.708(±0.008)	0.954(±0.02)	0.75(±0.01)	0.824(±0.006)	0.508(±0.022)	0.225(±0.021)
rf_97_n_300_depth_12_split_10_leaf_2	0.746(±0.018)	0.987(±0.006)	0.403(±0.023)	0.708(±0.008)	0.954(±0.019)	0.75(±0.01)	0.824(±0.006)	0.507(±0.022)	0.225(±0.021)
rf_134_n_400_depth_12_split_10_leaf_4	0.746(±0.018)	0.987(±0.005)	0.402(±0.023)	0.708(±0.008)	0.955(±0.018)	0.75(±0.01)	0.825(±0.006)	0.508(±0.021)	0.225(±0.02)
rf_170_n_500_depth_12_split_10_leaf_4	0.747(±0.018)	0.987(±0.006)	0.402(±0.023)	0.708(±0.008)	0.956(±0.019)	0.75(±0.01)	0.825(±0.006)	0.508(±0.022)	0.225(±0.02)
rf_92_n_300_depth_12_split_2_leaf_4	0.746(±0.019)	0.987(±0.006)	0.402(±0.022)	0.708(±0.008)	0.956(±0.019)	0.75(±0.01)	0.825(±0.006)	0.508(±0.022)	0.225(±0.02)
rf_95_n_300_depth_12_split_5_leaf_4	0.746(±0.019)	0.987(±0.006)	0.402(±0.022)	0.708(±0.008)	0.956(±0.019)	0.75(±0.01)	0.825(±0.006)	0.508(±0.022)	0.225(±0.02)
rf_25_n_100_depth_12_split_10_leaf_2	0.742(±0.017)	0.982(±0.006)	0.405(±0.024)	0.708(±0.008)	0.94(±0.02)	0.748(±0.01)	0.823(±0.006)	0.501(±0.024)	0.224(±0.022)
rf_61_n_200_depth_12_split_10_leaf_2	0.745(±0.018)	0.985(±0.006)	0.403(±0.024)	0.708(±0.008)	0.95(±0.02)	0.749(±0.01)	0.824(±0.006)	0.505(±0.023)	0.224(±0.022)
rf_18_n_100_depth_12_split_2_leaf_1	0.742(±0.018)	0.981(±0.006)	0.406(±0.023)	0.708(±0.008)	0.937(±0.02)	0.748(±0.01)	0.823(±0.006)	0.5(±0.022)	0.224(±0.021)
rf_62_n_200_depth_12_split_10_leaf_4	0.745(±0.018)	0.986(±0.006)	0.402(±0.023)	0.708(±0.008)	0.952(±0.019)	0.749(±0.01)	0.824(±0.006)	0.506(±0.021)	0.224(±0.021)
rf_98_n_300_depth_12_split_10_leaf_4	0.746(±0.018)	0.987(±0.005)	0.402(±0.023)	0.708(±0.008)	0.955(±0.018)	0.75(±0.009)	0.824(±0.006)	0.507(±0.02)	0.224(±0.02)
rf_11_n_100_depth_10_split_2_leaf_4	0.743(±0.019)	0.986(±0.005)	0.399(±0.023)	0.707(±0.008)	0.952(±0.017)	0.748(±0.01)	0.823(±0.006)	0.504(±0.021)	0.222(±0.021)
rf_123_n_400_depth_10_split_10_leaf_1	0.747(±0.018)	0.99(±0.005)	0.396(±0.023)	0.707(±0.008)	0.963(±0.018)	0.749(±0.01)	0.824(±0.006)	0.508(±0.022)	0.222(±0.021)
rf_14_n_100_depth_10_split_5_leaf_4	0.743(±0.019)	0.986(±0.005)	0.399(±0.023)	0.707(±0.008)	0.952(±0.017)	0.748(±0.01)	0.823(±0.006)	0.504(±0.021)	0.222(±0.021)
rf_82_n_300_depth_10_split_2_leaf_2	0.747(±0.018)	0.989(±0.005)	0.397(±0.023)	0.707(±0.008)	0.961(±0.017)	0.749(±0.01)	0.824(±0.006)	0.507(±0.022)	0.222(±0.021)
rf_118_n_400_depth_10_split_2_leaf_2	0.748(±0.018)	0.989(±0.005)	0.397(±0.023)	0.707(±0.008)	0.961(±0.017)	0.749(±0.01)	0.824(±0.006)	0.508(±0.021)	0.222(±0.02)
rf_120_n_400_depth_10_split_5_leaf_1	0.747(±0.018)	0.989(±0.005)	0.397(±0.022)	0.707(±0.008)	0.962(±0.017)	0.749(±0.01)	0.824(±0.006)	0.508(±0.021)	0.222(±0.02)
rf_121_n_400_depth_10_split_5_leaf_2	0.747(±0.018)	0.989(±0.005)	0.397(±0.022)	0.707(±0.008)	0.962(±0.018)	0.749(±0.01)	0.824(±0.006)	0.508(±0.022)	0.222(±0.02)
rf_153_n_500_depth_10_split_2_leaf_1	0.748(±0.018)	0.99(±0.005)	0.397(±0.022)	0.707(±0.008)	0.964(±0.017)	0.749(±0.009)	0.825(±0.006)	0.509(±0.02)	0.222(±0.02)
rf_154_n_500_depth_10_split_2_leaf_2	0.748(±0.018)	0.989(±0.005)	0.397(±0.022)	0.707(±0.008)	0.963(±0.017)	0.749(±0.009)	0.824(±0.006)	0.509(±0.021)	0.222(±0.02)
rf_156_n_500_depth_10_split_5_leaf_1	0.748(±0.018)	0.989(±0.005)	0.397(±0.022)	0.707(±0.008)	0.963(±0.017)	0.749(±0.01)	0.824(±0.006)	0.508(±0.021)	0.222(±0.02)
rf_157_n_500_depth_10_split_5_leaf_2	0.748(±0.018)	0.99(±0.005)	0.397(±0.022)	0.707(±0.008)	0.963(±0.018)	0.749(±0.01)	0.825(±0.006)	0.509(±0.022)	0.222(±0.02)
rf_160_n_500_depth_10_split_10_leaf_2	0.747(±0.018)	0.99(±0.005)	0.396(±0.022)	0.706(±0.008)	0.963(±0.017)	0.749(±0.009)	0.824(±0.006)	0.508(±0.021)	0.222(±0.02)
rf_161_n_500_depth_10_split_10_leaf_4	0.746(±0.019)	0.989(±0.005)	0.397(±0.023)	0.707(±0.008)	0.962(±0.018)	0.749(±0.01)	0.824(±0.006)	0.508(±0.022)	0.222(±0.02)
rf_48_n_200_depth_10_split_5_leaf_1	0.745(±0.018)	0.989(±0.005)	0.397(±0.023)	0.707(±0.008)	0.96(±0.017)	0.749(±0.01)	0.824(±0.006)	0.507(±0.021)	0.222(±0.02)
rf_83_n_300_depth_10_split_2_leaf_4	0.746(±0.019)	0.989(±0.005)	0.397(±0.023)	0.707(±0.008)	0.96(±0.018)	0.749(±0.01)	0.824(±0.006)	0.507(±0.021)	0.222(±0.02)
rf_86_n_300_depth_10_split_5_leaf_4	0.746(±0.019)	0.989(±0.005)	0.397(±0.023)	0.707(±0.008)	0.96(±0.018)	0.749(±0.01)	0.824(±0.006)	0.507(±0.021)	0.222(±0.02)
rf_15_n_100_depth_10_split_10_leaf_1	0.742(±0.018)	0.986(±0.005)	0.399(±0.024)	0.707(±0.008)	0.953(±0.018)	0.748(±0.01)	0.823(±0.006)	0.504(±0.023)	0.221(±0.022)
rf_16_n_100_depth_10_split_10_leaf_2	0.743(±0.018)	0.986(±0.005)	0.399(±0.025)	0.707(±0.009)	0.95(±0.018)	0.748(±0.011)	0.823(±0.006)	0.503(±0.024)	0.221(±0.022)
rf_12_n_100_depth_10_split_5_leaf_1	0.743(±0.018)	0.985(±0.006)	0.399(±0.023)	0.707(±0.008)	0.95(±0.02)	0.748(±0.01)	0.823(±0.006)	0.502(±0.022)	0.221(±0.021)
rf_159_n_500_depth_10_split_10_leaf_1	0.747(±0.018)	0.99(±0.005)	0.396(±0.023)	0.706(±0.008)	0.964(±0.018)	0.749(±0.01)	0.824(±0.006)	0.508(±0.022)	0.221(±0.021)
rf_17_n_100_depth_10_split_10_leaf_4	0.743(±0.02)	0.986(±0.006)	0.4(±0.023)	0.707(±0.008)	0.95(±0.019)	0.748(±0.01)	0.823(±0.006)	0.503(±0.023)	0.221(±0.021)
rf_46_n_200_depth_10_split_2_leaf_2	0.746(±0.019)	0.988(±0.005)	0.397(±0.023)	0.706(±0.008)	0.958(±0.018)	0.749(±0.01)	0.824(±0.006)	0.506(±0.022)	0.221(±0.021)
rf_51_n_200_depth_10_split_10_leaf_1	0.745(±0.018)	0.988(±0.006)	0.396(±0.023)	0.706(±0.008)	0.959(±0.019)	0.748(±0.01)	0.824(±0.006)	0.506(±0.022)	0.221(±0.021)
rf_52_n_200_depth_10_split_10_leaf_2	0.746(±0.019)	0.988(±0.005)	0.397(±0.023)	0.706(±0.008)	0.958(±0.018)	0.748(±0.01)	0.824(±0.006)	0.505(±0.022)	0.221(±0.021)
rf_53_n_200_depth_10_split_10_leaf_4	0.745(±0.019)	0.988(±0.005)	0.396(±0.023)	0.706(±0.008)	0.958(±0.018)	0.748(±0.01)	0.824(±0.006)	0.505(±0.022)	0.221(±0.021)
rf_88_n_300_depth_10_split_10_leaf_2	0.746(±0.018)	0.989(±0.005)	0.396(±0.023)	0.706(±0.008)	0.96(±0.017)	0.749(±0.01)	0.824(±0.006)	0.506(±0.022)	0.221(±0.021)
rf_10_n_100_depth_10_split_2_leaf_2	0.743(±0.019)	0.986(±0.006)	0.399(±0.023)	0.707(±0.008)	0.951(±0.019)	0.748(±0.01)	0.823(±0.006)	0.503(±0.022)	0.221(±0.02)
rf_119_n_400_depth_10_split_2_leaf_4	0.747(±0.018)	0.989(±0.005)	0.396(±0.023)	0.706(±0.008)	0.96(±0.018)	0.749(±0.01)	0.824(±0.006)	0.506(±0.021)	0.221(±0.02)
rf_122_n_400_depth_10_split_5_leaf_4	0.747(±0.018)	0.989(±0.005)	0.396(±0.023)	0.706(±0.008)	0.96(±0.018)	0.749(±0.01)	0.824(±0.006)	0.506(±0.021)	0.221(±0.02)
rf_124_n_400_depth_10_split_10_leaf_2	0.746(±0.018)	0.989(±0.005)	0.396(±0.022)	0.706(±0.008)	0.962(±0.017)	0.749(±0.01)	0.824(±0.006)	0.507(±0.021)	0.221(±0.02)
rf_125_n_400_depth_10_split_10_leaf_4	0.746(±0.018)	0.989(±0.005)	0.396(±0.023)	0.706(±0.008)	0.962(±0.018)	0.749(±0.01)	0.824(±0.006)	0.507(±0.021)	0.221(±0.02)
rf_13_n_100_depth_10_split_5_leaf_2	0.744(±0.018)	0.986(±0.006)	0.399(±0.023)	0.707(±0.008)	0.951(±0.019)	0.748(±0.01)	0.823(±0.006)	0.503(±0.021)	0.221(±0.02)
rf_155_n_500_depth_10_split_2_leaf_4	0.747(±0.018)	0.989(±0.005)	0.396(±0.022)	0.706(±0.008)	0.961(±0.018)	0.749(±0.01)	0.824(±0.006)	0.507(±0.021)	0.221(±0.02)
rf_158_n_500_depth_10_split_5_leaf_4	0.747(±0.018)	0.989(±0.005)	0.396(±0.022)	0.706(±0.008)	0.961(±0.018)	0.749(±0.01)	0.824(±0.006)	0.507(±0.021)	0.221(±0.02)
rf_45_n_200_depth_10_split_2_leaf_1	0.746(±0.018)	0.989(±0.006)	0.397(±0.022)	0.706(±0.008)	0.96(±0.019)	0.749(±0.009)	0.824(±0.006)	0.507(±0.021)	0.221(±0.02)
rf_47_n_200_depth_10_split_2_leaf_4	0.745(±0.019)	0.988(±0.005)	0.397(±0.022)	0.707(±0.008)	0.958(±0.018)	0.749(±0.009)	0.824(±0.006)	0.506(±0.021)	0.221(±0.02)
rf_49_n_200_depth_10_split_5_leaf_2	0.746(±0.017)	0.988(±0.005)	0.397(±0.023)	0.707(±0.008)	0.959(±0.018)	0.749(±0.009)	0.824(±0.006)	0.506(±0.021)	0.221(±0.02)
rf_50_n_200_depth_10_split_5_leaf_4	0.745(±0.019)	0.988(±0.005)	0.397(±0.022)	0.707(±0.008)	0.958(±0.018)	0.749(±0.009)	0.824(±0.006)	0.506(±0.021)	0.221(±0.02)
rf_84_n_300_depth_10_split_5_leaf_1	0.747(±0.018)	0.989(±0.005)	0.397(±0.022)	0.706(±0.008)	0.961(±0.017)	0.749(±0.01)	0.824(±0.006)	0.507(±0.021)	0.221(±0.02)
rf_85_n_300_depth_10_split_5_leaf_2	0.747(±0.017)	0.989(±0.005)	0.397(±0.023)	0.706(±0.008)	0.961(±0.018)	0.749(±0.01)	0.824(±0.006)	0.507(±0.022)	0.221(±0.02)
rf_87_n_300_depth_10_split_10_leaf_1	0.746(±0.018)	0.989(±0.005)	0.396(±0.023)	0.706(±0.008)	0.962(±0.018)	0.749(±0.01)	0.824(±0.006)	0.507(±0.021)	0.221(±0.02)
rf_89_n_300_depth_10_split_10_leaf_4	0.745(±0.019)	0.989(±0.005)	0.396(±0.023)	0.706(±0.008)	0.96(±0.018)	0.749(±0.01)	0.824(±0.006)	0.506(±0.022)	0.221(±0.02)
rf_9_n_100_depth_10_split_2_leaf_1	0.743(±0.018)	0.986(±0.005)	0.399(±0.023)	0.707(±0.008)	0.951(±0.018)	0.748(±0.01)	0.823(±0.006)	0.503(±0.021)	0.221(±0.02)
rf_117_n_400_depth_10_split_2_leaf_1	0.748(±0.018)	0.989(±0.005)	0.396(±0.022)	0.706(±0.008)	0.962(±0.016)	0.749(±0.009)	0.824(±0.006)	0.508(±0.02)	0.221(±0.019)
rf_81_n_300_depth_10_split_2_leaf_1	0.747(±0.018)	0.989(±0.005)	0.396(±0.022)	0.706(±0.008)	0.961(±0.018)	0.749(±0.009)	0.824(±0.005)	0.507(±0.02)	0.221(±0.019)
rf_0_n_100_depth_8_split_2_leaf_1	0.742(±0.018)	0.989(±0.005)	0.392(±0.023)	0.705(±0.008)	0.961(±0.018)	0.747(±0.01)	0.823(±0.006)	0.504(±0.022)	0.218(±0.021)
rf_6_n_100_depth_8_split_10_leaf_1	0.741(±0.019)	0.99(±0.005)	0.391(±0.024)	0.705(±0.008)	0.963(±0.018)	0.747(±0.01)	0.823(±0.006)	0.504(±0.023)	0.217(±0.021)
rf_8_n_100_depth_8_split_10_leaf_4	0.741(±0.018)	0.989(±0.005)	0.391(±0.023)	0.705(±0.008)	0.962(±0.018)	0.747(±0.01)	0.823(±0.006)	0.503(±0.022)	0.217(±0.021)
rf_111_n_400_depth_8_split_5_leaf_1	0.744(±0.018)	0.992(±0.005)	0.389(±0.023)	0.704(±0.008)	0.97(±0.016)	0.747(±0.009)	0.824(±0.006)	0.506(±0.02)	0.217(±0.02)
rf_147_n_500_depth_8_split_5_leaf_1	0.745(±0.019)	0.992(±0.005)	0.389(±0.022)	0.704(±0.008)	0.971(±0.018)	0.748(±0.009)	0.824(±0.006)	0.507(±0.021)	0.217(±0.02)
rf_2_n_100_depth_8_split_2_leaf_4	0.741(±0.018)	0.989(±0.005)	0.391(±0.022)	0.705(±0.008)	0.961(±0.018)	0.747(±0.009)	0.823(±0.006)	0.503(±0.021)	0.217(±0.02)
rf_39_n_200_depth_8_split_5_leaf_1	0.743(±0.018)	0.991(±0.005)	0.389(±0.023)	0.704(±0.008)	0.967(±0.016)	0.747(±0.01)	0.823(±0.006)	0.505(±0.02)	0.217(±0.02)
rf_3_n_100_depth_8_split_5_leaf_1	0.74(±0.018)	0.989(±0.005)	0.391(±0.023)	0.705(±0.008)	0.962(±0.016)	0.747(±0.009)	0.823(±0.006)	0.503(±0.02)	0.217(±0.02)
rf_5_n_100_depth_8_split_5_leaf_4	0.741(±0.018)	0.989(±0.005)	0.391(±0.022)	0.705(±0.008)	0.961(±0.018)	0.747(±0.009)	0.823(±0.006)	0.503(±0.021)	0.217(±0.02)
rf_112_n_400_depth_8_split_5_leaf_2	0.744(±0.019)	0.991(±0.005)	0.389(±0.022)	0.704(±0.008)	0.968(±0.016)	0.747(±0.009)	0.824(±0.005)	0.506(±0.02)	0.217(±0.019)
rf_76_n_300_depth_8_split_5_leaf_2	0.744(±0.019)	0.991(±0.004)	0.388(±0.024)	0.704(±0.008)	0.967(±0.015)	0.747(±0.01)	0.823(±0.006)	0.505(±0.021)	0.216(±0.021)
rf_7_n_100_depth_8_split_10_leaf_2	0.741(±0.019)	0.99(±0.005)	0.39(±0.023)	0.704(±0.008)	0.963(±0.018)	0.747(±0.01)	0.823(±0.006)	0.503(±0.022)	0.216(±0.021)
rf_108_n_400_depth_8_split_2_leaf_1	0.745(±0.019)	0.992(±0.005)	0.388(±0.023)	0.704(±0.008)	0.969(±0.018)	0.747(±0.01)	0.823(±0.006)	0.505(±0.021)	0.216(±0.02)
rf_114_n_400_depth_8_split_10_leaf_1	0.744(±0.019)	0.992(±0.005)	0.388(±0.022)	0.704(±0.008)	0.97(±0.016)	0.747(±0.009)	0.823(±0.006)	0.505(±0.02)	0.216(±0.02)
rf_115_n_400_depth_8_split_10_leaf_2	0.744(±0.019)	0.992(±0.005)	0.388(±0.022)	0.704(±0.008)	0.97(±0.017)	0.747(±0.009)	0.823(±0.006)	0.506(±0.02)	0.216(±0.02)
rf_144_n_500_depth_8_split_2_leaf_1	0.745(±0.019)	0.992(±0.005)	0.388(±0.022)	0.704(±0.008)	0.97(±0.018)	0.747(±0.009)	0.824(±0.006)	0.506(±0.021)	0.216(±0.02)
rf_145_n_500_depth_8_split_2_leaf_2	0.745(±0.019)	0.992(±0.005)	0.388(±0.023)	0.704(±0.008)	0.969(±0.017)	0.747(±0.009)	0.823(±0.006)	0.505(±0.02)	0.216(±0.02)
rf_150_n_500_depth_8_split_10_leaf_1	0.745(±0.019)	0.992(±0.005)	0.388(±0.023)	0.704(±0.008)	0.971(±0.017)	0.747(±0.009)	0.824(±0.006)	0.506(±0.021)	0.216(±0.02)
rf_152_n_500_depth_8_split_10_leaf_4	0.744(±0.019)	0.991(±0.005)	0.388(±0.022)	0.704(±0.008)	0.969(±0.016)	0.747(±0.009)	0.823(±0.006)	0.505(±0.02)	0.216(±0.02)
rf_1_n_100_depth_8_split_2_leaf_2	0.74(±0.018)	0.989(±0.005)	0.39(±0.023)	0.704(±0.008)	0.959(±0.018)	0.746(±0.01)	0.823(±0.006)	0.501(±0.022)	0.216(±0.02)
rf_36_n_200_depth_8_split_2_leaf_1	0.744(±0.019)	0.991(±0.005)	0.388(±0.023)	0.704(±0.008)	0.968(±0.017)	0.747(±0.01)	0.823(±0.006)	0.505(±0.021)	0.216(±0.02)
rf_37_n_200_depth_8_split_2_leaf_2	0.743(±0.019)	0.991(±0.005)	0.389(±0.023)	0.704(±0.008)	0.966(±0.017)	0.747(±0.009)	0.823(±0.006)	0.504(±0.021)	0.216(±0.02)
rf_40_n_200_depth_8_split_5_leaf_2	0.743(±0.019)	0.991(±0.004)	0.389(±0.023)	0.704(±0.008)	0.967(±0.015)	0.747(±0.01)	0.823(±0.006)	0.505(±0.021)	0.216(±0.02)
rf_42_n_200_depth_8_split_10_leaf_1	0.743(±0.019)	0.991(±0.005)	0.388(±0.023)	0.704(±0.008)	0.967(±0.017)	0.747(±0.01)	0.823(±0.006)	0.504(±0.021)	0.216(±0.02)
rf_43_n_200_depth_8_split_10_leaf_2	0.743(±0.019)	0.991(±0.005)	0.388(±0.022)	0.704(±0.008)	0.968(±0.016)	0.747(±0.009)	0.823(±0.006)	0.505(±0.02)	0.216(±0.02)
rf_44_n_200_depth_8_split_10_leaf_4	0.743(±0.019)	0.991(±0.005)	0.388(±0.023)	0.704(±0.008)	0.967(±0.017)	0.747(±0.01)	0.823(±0.006)	0.504(±0.021)	0.216(±0.02)
rf_4_n_100_depth_8_split_5_leaf_2	0.741(±0.018)	0.989(±0.005)	0.391(±0.022)	0.704(±0.008)	0.96(±0.017)	0.747(±0.01)	0.823(±0.006)	0.502(±0.021)	0.216(±0.02)
rf_75_n_300_depth_8_split_5_leaf_1	0.744(±0.018)	0.991(±0.004)	0.389(±0.023)	0.704(±0.008)	0.968(±0.016)	0.747(±0.009)	0.823(±0.006)	0.505(±0.021)	0.216(±0.02)
rf_79_n_300_depth_8_split_10_leaf_2	0.744(±0.019)	0.991(±0.005)	0.388(±0.022)	0.704(±0.008)	0.969(±0.017)	0.747(±0.009)	0.823(±0.006)	0.505(±0.021)	0.216(±0.02)
rf_110_n_400_depth_8_split_2_leaf_4	0.744(±0.018)	0.991(±0.005)	0.388(±0.022)	0.704(±0.007)	0.968(±0.016)	0.747(±0.009)	0.823(±0.005)	0.505(±0.02)	0.216(±0.019)
rf_113_n_400_depth_8_split_5_leaf_4	0.744(±0.018)	0.991(±0.005)	0.388(±0.022)	0.704(±0.007)	0.968(±0.016)	0.747(±0.009)	0.823(±0.005)	0.505(±0.02)	0.216(±0.019)
rf_116_n_400_depth_8_split_10_leaf_4	0.743(±0.019)	0.991(±0.005)	0.388(±0.022)	0.704(±0.008)	0.968(±0.017)	0.747(±0.009)	0.823(±0.006)	0.505(±0.02)	0.216(±0.019)
rf_146_n_500_depth_8_split_2_leaf_4	0.744(±0.019)	0.992(±0.004)	0.388(±0.022)	0.704(±0.008)	0.969(±0.016)	0.747(±0.009)	0.824(±0.005)	0.506(±0.02)	0.216(±0.019)
rf_148_n_500_depth_8_split_5_leaf_2	0.745(±0.019)	0.991(±0.005)	0.388(±0.022)	0.704(±0.008)	0.969(±0.017)	0.747(±0.009)	0.823(±0.005)	0.505(±0.02)	0.216(±0.019)
rf_149_n_500_depth_8_split_5_leaf_4	0.744(±0.019)	0.992(±0.004)	0.388(±0.022)	0.704(±0.008)	0.969(±0.016)	0.747(±0.009)	0.824(±0.005)	0.506(±0.02)	0.216(±0.019)
rf_151_n_500_depth_8_split_10_leaf_2	0.744(±0.019)	0.992(±0.005)	0.388(±0.022)	0.704(±0.008)	0.97(±0.016)	0.747(±0.009)	0.824(±0.005)	0.506(±0.02)	0.216(±0.019)
rf_38_n_200_depth_8_split_2_leaf_4	0.743(±0.019)	0.991(±0.005)	0.389(±0.022)	0.704(±0.007)	0.966(±0.017)	0.747(±0.009)	0.823(±0.006)	0.504(±0.02)	0.216(±0.019)
rf_41_n_200_depth_8_split_5_leaf_4	0.743(±0.019)	0.991(±0.005)	0.389(±0.022)	0.704(±0.007)	0.966(±0.017)	0.747(±0.009)	0.823(±0.006)	0.504(±0.02)	0.216(±0.019)
rf_72_n_300_depth_8_split_2_leaf_1	0.745(±0.019)	0.991(±0.005)	0.387(±0.022)	0.704(±0.008)	0.969(±0.017)	0.747(±0.009)	0.823(±0.006)	0.505(±0.021)	0.215(±0.02)
rf_73_n_300_depth_8_split_2_leaf_2	0.744(±0.019)	0.991(±0.005)	0.388(±0.023)	0.704(±0.008)	0.968(±0.016)	0.747(±0.009)	0.823(±0.005)	0.504(±0.02)	0.215(±0.02)
rf_78_n_300_depth_8_split_10_leaf_1	0.744(±0.019)	0.991(±0.004)	0.388(±0.023)	0.704(±0.008)	0.969(±0.016)	0.747(±0.009)	0.823(±0.006)	0.505(±0.02)	0.215(±0.02)
rf_80_n_300_depth_8_split_10_leaf_4	0.743(±0.019)	0.991(±0.005)	0.388(±0.022)	0.704(±0.008)	0.967(±0.017)	0.747(±0.009)	0.823(±0.006)	0.504(±0.021)	0.215(±0.02)
rf_109_n_400_depth_8_split_2_leaf_2	0.744(±0.019)	0.991(±0.005)	0.388(±0.022)	0.704(±0.008)	0.968(±0.017)	0.747(±0.009)	0.823(±0.005)	0.504(±0.02)	0.215(±0.019)
rf_74_n_300_depth_8_split_2_leaf_4	0.744(±0.018)	0.991(±0.004)	0.388(±0.022)	0.704(±0.007)	0.966(±0.016)	0.747(±0.009)	0.823(±0.006)	0.504(±0.02)	0.215(±0.019)
rf_77_n_300_depth_8_split_5_leaf_4	0.744(±0.018)	0.991(±0.004)	0.388(±0.022)	0.704(±0.007)	0.966(±0.016)	0.747(±0.009)	0.823(±0.006)	0.504(±0.02)	0.215(±0.019)
