# Supplementary material for: Deep Learning on High-Throughput Transcriptomics to Predict Drug-Induced Liver Injury
Source: Front Bioeng Biotechnol. 2020 Nov 27;8:562677. doi: 10.3389/fbioe.2020.562677 (PMC7728858; doi:10.3389/fbioe.2020.562677)
Supplement: Supplementary file 7 [file Table_4.XLSX]

## Sheet: balanced_sample_updated
model	auc	mcc	f1	kappa	acc	balanced_accuracy	sensitivity	specificity
1	0.813116	0.474856	0.74502	0.473827	0.736896	0.73693	0.769547	0.704312
2	0.807898	0.407809	0.687568	0.405901	0.70298	0.702931	0.654321	0.75154
3	0.806048	0.421081	0.701903	0.420383	0.710175	0.710204	0.681725	0.738683
4	0.805786	0.455396	0.724246	0.45528	0.727646	0.727635	0.716049	0.73922
5	0.804907	0.43885	0.719424	0.43885	0.719424	0.719425	0.720165	0.718686
6	0.801666	0.432828	0.713098	0.432696	0.716341	0.716354	0.704312	0.728395
7	0.797741	0.434737	0.717949	0.434736	0.717369	0.717368	0.718686	0.716049
8	0.797382	0.402739	0.681223	0.399867	0.699897	0.699958	0.640657	0.759259
9	0.795405	0.426551	0.710881	0.426507	0.713258	0.71325	0.705761	0.720739
10	0.795177	0.467267	0.744094	0.465522	0.732785	0.732741	0.776181	0.6893
11	0.795122	0.420729	0.704403	0.420373	0.710175	0.710196	0.689938	0.730453
12	0.794142	0.404611	0.693446	0.40394	0.701953	0.701982	0.673511	0.730453
13	0.794137	0.424507	0.714868	0.42445	0.71223	0.712221	0.720739	0.703704
14	0.793561	0.430662	0.712953	0.430618	0.715313	0.715306	0.707819	0.722793
15	0.793182	0.417897	0.693966	0.416184	0.708119	0.708072	0.662551	0.753593
16	0.792882	0.4187	0.691974	0.416302	0.708119	0.708174	0.655031	0.761317
17	0.791826	0.441124	0.725253	0.440885	0.720452	0.720435	0.737166	0.703704
18	0.791816	0.436803	0.719836	0.436788	0.718397	0.718392	0.722793	0.713992
19	0.789504	0.418305	0.708548	0.418297	0.709147	0.70915	0.706366	0.711934
20	0.788526	0.408081	0.701863	0.408026	0.704008	0.704016	0.696099	0.711934
21	0.788336	0.527427	0.784314	0.502413	0.751285	0.751128	0.903491	0.598765
22	0.788159	0.434574	0.729412	0.432627	0.716341	0.716292	0.76386	0.668724
23	0.788076	0.402739	0.681223	0.399867	0.699897	0.699958	0.640657	0.759259
24	0.787838	0.410153	0.707441	0.410083	0.705036	0.705045	0.713992	0.696099
25	0.787808	0.446018	0.731076	0.445052	0.722508	0.722541	0.755144	0.689938
26	0.786997	0.404013	0.697917	0.40389	0.701953	0.70194	0.6893	0.714579
27	0.786967	0.451459	0.738281	0.449068	0.724563	0.72451	0.776181	0.67284
28	0.786072	0.40397	0.699793	0.403915	0.701953	0.701961	0.694045	0.709877
29	0.785552	0.408017	0.704918	0.408013	0.704008	0.704006	0.706366	0.701646
30	0.785138	0.414182	0.706488	0.414181	0.707091	0.70709	0.705761	0.708419
31	0.784899	0.404055	0.706478	0.403887	0.701953	0.701938	0.716632	0.687243
32	0.784428	0.452136	0.733799	0.451217	0.725591	0.725623	0.757202	0.694045
33	0.784293	0.408017	0.703093	0.408013	0.704008	0.704006	0.701646	0.706366
34	0.783714	0.418293	0.709744	0.418292	0.709147	0.709146	0.710472	0.707819
35	0.783655	0.420349	0.709877	0.420349	0.710175	0.710174	0.709877	0.710472
36	0.783591	0.435859	0.732039	0.432751	0.716341	0.716402	0.77572	0.657084
37	0.783431	0.414198	0.708887	0.414176	0.707091	0.707086	0.712526	0.701646
38	0.782708	0.38814	0.684989	0.387497	0.693731	0.69376	0.665298	0.722222
39	0.781263	0.385675	0.686254	0.385381	0.692703	0.692683	0.67284	0.712526
40	0.781111	0.40409	0.697917	0.403922	0.701953	0.701967	0.687885	0.716049
41	0.780917	0.422488	0.713558	0.422415	0.711202	0.711212	0.720165	0.702259
42	0.78063	0.444601	0.736944	0.440977	0.720452	0.720517	0.783951	0.657084
43	0.780372	0.410083	0.704428	0.410075	0.705036	0.705039	0.702259	0.707819
44	0.780068	0.420317	0.722277	0.418351	0.709147	0.709196	0.757202	0.661191
45	0.779797	0.410645	0.712136	0.410102	0.705036	0.705062	0.730453	0.679671
46	0.779142	0.416304	0.710204	0.416248	0.708119	0.708127	0.716049	0.700205
47	0.778319	0.402251	0.694648	0.401876	0.700925	0.700947	0.679671	0.722222
48	0.77809	0.387639	0.689583	0.387479	0.693731	0.693745	0.679671	0.707819
49	0.777664	0.424729	0.717742	0.424438	0.71223	0.712211	0.731006	0.693416
50	0.777596	0.395701	0.69877	0.395688	0.697842	0.697846	0.701646	0.694045
